# Supplementary material
Source: ML conference proceedings conference paper supplement (https://openaccess.thecvf.com/content/CVPR2026/html/Hao_Rethinking_SNN_Online_CVPR_2026_paper.html)
Supplement: Supplementary file 1 [file Hao_Rethinking_SNN_Online_CVPR_2026_supplemental.pdf]

# Rethinking SNN Online Training and Deployment: Gradient-Coherent Learning via Hybrid-Driven LIF Model

## Supplementary Material

### 1. Experimental configuration

For experimental cases in Tabs.1-3, we choose Stochastic Gradient Descent [1] as our optimizer and Cosine Annealing [6] as our scheduler. The initial learning rate, weight decay and batch-size are respectively set to 0.025, 0 and 256 for ImageNet-1k, 0.01,  $5 \times 10^{-4}$  and 64 for other cases. Each case is executed once with 300 training epochs and a specific random seed. We consider various data augmentation techniques, including Auto-Augment [2], Cutout [3] and Mixup [7].

Specifically, the HD-LIF cases related to ImageNet-1k and Tab.2 utilize 1.5-bit weight compression [5], while the remaining cases use 1-bit scheme [4]. The evaluation of performance metrics in Tab.2 is completed on NVIDIA A100-SXM4-40GB. The calculation of SOPs(M) and Energy(mJ) in Tab.2 refers to [8] and is oriented towards convolutional layers.

### 2. Proof of Theorem

**Theorem 4.2** For HD-LIF model under the condition of online training, combining with Definition 4.1, we will have:

$\forall t, i \in [1, T], t < i, \epsilon^l[i, t] = \chi^l[i, i] \prod_{j=t+1}^i \chi^l[j, j-1]$ , here we define  $\chi^l[i, i] = \frac{\partial s_i^l}{\partial m_i^l} \in \{0, 1\}, \chi^l[j, j-1] = \frac{\partial m_j^l}{\partial m_{j-1}^l} \in \{0, \lambda_j^l\}$ .

(i) If  $\exists k \in [t, T], \chi^l[k, k] = 1$ , then we can directly derive the gradient relationship between STBP and online training:

$$\left( \frac{\partial \mathcal{L}}{\partial m_t^l} \right)_{Online} = \frac{\chi^l[t, t]}{(\chi^l[t, t] + \sum_{i=t+1}^T \chi^l[i, i] \prod_{j=t+1}^i \chi^l[j, j-1])} \left( \frac{\partial \mathcal{L}}{\partial m_t^l} \right)_{STBP}$$

(ii) Under more general conditions,  $\left( \frac{\partial \mathcal{L}}{\partial m_t^l} \right)_{STBP} \in \left\{ 1, \prod_{j=t+1}^{t^*} \lambda_j^l \right\} \cdot \left( \frac{\partial \mathcal{L}}{\partial s_t^l} \right)$ , here  $\chi^l[t^*, t^*] = 1 \wedge \forall k \in [t, t^*), \chi^l[k, k] = 0$ .

*Proof.* According to Eqs.(2-3), we can separately write  $\frac{\partial s_t^l}{\partial m_t^l}, \frac{\partial m_t^l}{\partial m_{t-1}^l}$  of the HD-LIF model at the  $t$ -th time step for

both firing and silence states:

$$\begin{aligned} \chi^l[t, t] &= \frac{\partial s_t^l}{\partial m_t^l} = \begin{cases} 1, & m_t^l \geq \theta_t^l \\ 0, & \text{otherwise} \end{cases}, \\ \chi^l[t, t-1] &= \frac{\partial m_t^l}{\partial m_{t-1}^l} = \lambda_t^l + \frac{\partial m_t^l}{\partial s_{t-1}^l} \frac{\partial s_{t-1}^l}{\partial m_{t-1}^l} \\ &= \begin{cases} 0, & m_{t-1}^l \geq \theta_{t-1}^l \\ \lambda_t^l, & \text{otherwise} \end{cases}. \end{aligned} \quad (S1)$$

For (i), combining Eq.(S1) with Definition 4.1, we can rewrite the relationship between  $\left( \frac{\partial \mathcal{L}}{\partial m_t^l} \right)_{STBP}$  and  $\left( \frac{\partial \mathcal{L}}{\partial m_t^l} \right)_{Online}$  in the form of  $\forall i \in [t, T], \chi^l[i, i], \chi^l[i+1, i]$ :

$$\begin{aligned} \left( \frac{\partial \mathcal{L}}{\partial m_t^l} \right)_{STBP} &= \frac{\partial \mathcal{L}}{\partial s_t^l} \sum_{i=t}^T \epsilon^l[i, t] \\ &= \frac{\partial \mathcal{L}}{\partial s_t^l} \left( \chi^l[t, t] + \sum_{i=t+1}^T \chi^l[i, i] \prod_{j=t+1}^i \chi^l[j, j-1] \right). \end{aligned} \quad (S2)$$

As  $\left( \frac{\partial \mathcal{L}}{\partial m_t^l} \right)_{Online} = \frac{\partial \mathcal{L}}{\partial s_t^l} \chi^l[t, t]$  and  $\exists k \in [t, T], \chi^l[k, k] = 1$ , if  $\chi^l[t, t] = 1$ , obviously  $\chi^l[t, t] + \sum_{i=t+1}^T \chi^l[i, i] \prod_{j=t+1}^i \chi^l[j, j-1] > 0$ ; otherwise, we choose  $k \in [t+1, T]$ , s.t.  $\forall i \in [t, k], \chi^l[i, i] = 0 \wedge \chi^l[k, k] = 1$ , then one can note that  $\chi^l[t, t] + \sum_{i=t+1}^T \chi^l[i, i] \prod_{j=t+1}^i \chi^l[j, j-1] \geq \chi^l[k, k] \prod_{j=t+1}^k \chi^l[j, j-1] = \prod_{j=t+1}^k \lambda_j^l > 0$ .

Therefore, we can finally have  $\left( \frac{\partial \mathcal{L}}{\partial m_t^l} \right)_{Online} = \frac{\chi^l[t, t]}{(\chi^l[t, t] + \sum_{i=t+1}^T \chi^l[i, i] \prod_{j=t+1}^i \chi^l[j, j-1])} \left( \frac{\partial \mathcal{L}}{\partial m_t^l} \right)_{STBP}$ .

For (ii), when  $\chi^l[t, t] = 1$ , we will have  $\chi^l[t+1, t] = 0$  according to Eq.(S1). Based on (i), we can further derive  $\left( \frac{\partial \mathcal{L}}{\partial m_t^l} \right)_{Online} =$

$$\frac{1}{(1 + \sum_{i=t+1}^T \chi^l[i, i] \prod_{j=t+2}^i \chi^l[j, j-1])} \left( \frac{\partial \mathcal{L}}{\partial m_t^l} \right)_{STBP}$$

When  $\chi^l[t, t] = 0$ , we have  $\forall k \in [t, t^*), \chi^l[k, k] = 0, \chi^l[k+1, k] = \lambda_k^l$  and  $\chi^l[t^*, t^*] = 1, \chi^l[t^*+1, t^*] = 0$ , Eq.(S2) can then be unfolded according to the following

process:

$$\begin{aligned}
\left(\frac{\partial \mathcal{L}}{\partial \mathbf{m}_t^l}\right)_{STBP} &= \frac{\partial \mathcal{L}}{\partial \mathbf{s}_t^l} \left( \mathbf{x}^l[t, t] + \sum_{i=t+1}^T \mathbf{x}^l[i, i] \prod_{j=t+1}^i \mathbf{x}^l[j, j-1] \right) \\
&= \frac{\partial \mathcal{L}}{\partial \mathbf{s}_t^l} \left( 0 + \sum_{i=t+1}^{t^*} 0 \cdot \prod_{j=t+1}^i \mathbf{x}^l[j, j-1] \right) + \\
&\quad \frac{\partial \mathcal{L}}{\partial \mathbf{s}_t^l} \mathbf{x}^l[t^*, t^*] \prod_{j=t+1}^{t^*} \mathbf{x}^l[j, j-1] + \\
&\quad \frac{\partial \mathcal{L}}{\partial \mathbf{s}_t^l} \sum_{i=t^*+1}^T \mathbf{x}^l[i, i] \prod_{j=t+1 \wedge j \neq t^*+1}^i \mathbf{x}^l[j, j-1] \cdot 0 \\
&= \frac{\partial \mathcal{L}}{\partial \mathbf{s}_t^l} \prod_{j=t+1}^{t^*} \mathbf{x}^l[j, j-1] \\
&= \frac{\partial \mathcal{L}}{\partial \mathbf{s}_t^l} \prod_{j=t+1}^{t^*} \lambda_j^l \tag{S3}
\end{aligned}$$

□

## References

- [1] Léon Bottou. Stochastic gradient descent tricks. In *Neural networks: Tricks of the trade*, pages 421–436. Springer, 2012. 1
- [2] Ekin D Cubuk, Barret Zoph, Dandelion Mane, Vijay Vasudevan, and Quoc V Le. Autoaugment: Learning augmentation strategies from data. In *CVPR*, 2019. 1
- [3] Terrance DeVries and Graham W Taylor. Improved regularization of convolutional neural networks with cutout. *arXiv preprint arXiv:1708.04552*, 2017. 1
- [4] Nianhui Guo, Joseph Bethge, Christoph Meinel, and Haojin Yang. Join the high accuracy club on imagenet with a binary neural network ticket. *arXiv preprint arXiv:2211.12933*, 2022. 1
- [5] Fengfu Li, Bin Liu, Xiaoxing Wang, Bo Zhang, and Junchi Yan. Ternary weight networks. *arXiv preprint arXiv:1605.04711*, 2016. 1
- [6] Ilya Loshchilov and Frank Hutter. SGDR: stochastic gradient descent with warm restarts. In *ICLR*, 2017. 1
- [7] Hongyi Zhang, Moustapha Cisse, Yann N Dauphin, and David Lopez-Paz. Mixup: Beyond empirical risk minimization. *arXiv preprint arXiv:1710.09412*, 2017. 1
- [8] Zhaokun Zhou, Yuesheng Zhu, Chao He, Yaowei Wang, Shuicheng Yan, Yonghong Tian, and Yuan Li. Spikformer: When spiking neural network meets transformer. In *ICLR*, 2023. 1
